# Supplementary material
Source: PubMed Central journal article supplement (PMC5391755)
Supplement: 10.1074_M116.773408_jbc.M116.773408-1.pdf [file 10.1074_M116.773408_jbc.M116.773408-1.pdf]

## **SUPPLEMENTAL DATA**

### **MECHANISTIC INSIGHTS INTO THE ALLOSTERIC REGULATION OF BACTERIAL ADP-GLUCOSE PYROPHOSPHORYLASES**

**Natalia Comino<sup>1,§</sup>, Javier Cifuentes<sup>1,§</sup>, Alberto Marina<sup>1</sup>, Ane Orrantia<sup>1</sup>, Ander Eguskiza<sup>1</sup>, Marcelo E. Guerin<sup>1,2,3,4,\*</sup>**

From the <sup>1</sup>Structural Biology Unit, CIC bioGUNE, Bizkaia Technology Park, 48160 Derio, Spain, <sup>2</sup>Unidad de Biofísica, Centro Mixto Consejo Superior de Investigaciones Científicas - Universidad del País Vasco/Euskal Herriko Unibertsitatea (CSIC,UPV/EHU), Barrio Sarriena s/n, Leioa, Bizkaia, 48940, Spain, <sup>3</sup>Departamento de Bioquímica, Universidad del País Vasco, Spain, <sup>4</sup>IKERBASQUE, Basque Foundation for Science, 48013, Bilbao, Spain.

## TABLE OF CONTENTS

### 1. SUPPLEMENTAL TABLE

Table S1: *EcAGPase*•R130A data collection and refinement statistics.

### 2. SUPPLEMENTAL FIGURES

Figure S1: The crystal structure of *EcAGPase*•R130A.

Figure S2: Evolution of the FBP regulatory site within the enterobacteriaceae family of AGPases.

## 1. SUPPLEMENTAL TABLE

**Table 1.** *EcAGPase*•R130A data collection and refinement statistics.

|                                                      | <b><i>EcAGPase</i> R130A</b>             |
|------------------------------------------------------|------------------------------------------|
| <b>Beamline / PDB code</b>                           | I04 DLS / 5MNI                           |
| <b>Wavelength (Å)</b>                                | 0.9795                                   |
| <b>Resolution range (Å)</b>                          | 73.8 - 3.09<br>(3.201 - 3.09)            |
| <b>Space group</b>                                   | <i>P</i> 2 <sub>1</sub>                  |
| <b>Unit cell</b>                                     | 94.2243 147.603 125.572<br>90 91.5238 90 |
| <b>Total reflections</b>                             | 210464 (21224)                           |
| <b>Unique reflections</b>                            | 62893 (6268)                             |
| <b>Multiplicity</b>                                  | 3.3 (3.4)                                |
| <b>Completeness (%)</b>                              | 0.99 (1.00)                              |
| <b>Mean I/sigma (I)</b>                              | 8.86 (1.23)                              |
| <b>Wilson B-factor</b>                               | 84.78                                    |
| <b>R-merge</b>                                       | 0.08515 (0.9436)                         |
| <b>R-meas</b>                                        | 0.1016 (1.122)                           |
| <b>CC1/2</b>                                         | 0.997 (0.524)                            |
| <b>CC*</b>                                           | 0.999 (0.829)                            |
| <b>Reflections used in refinement</b>                | 62619 (6176)                             |
| <b>Reflections used for R-free</b>                   | 3163 (321)                               |
| <b>R-work</b>                                        | 0.2356 (0.3831)                          |
| <b>R-free</b>                                        | 0.2727 (0.4124)                          |
| <b>R.m.s. coordinates error (Å)<br/>Luzzati plot</b> | 0.6528                                   |
| <b>Number of non-hydrogen atoms</b>                  | 23701                                    |
| <b>Macromolecules</b>                                | 23701                                    |
| <b>Ligands</b>                                       | -                                        |
| <b>Protein residues</b>                              | 3182                                     |
| <b>RMS (bonds)</b>                                   | 0.005                                    |
| <b>RMS (angles)</b>                                  | 0.68                                     |
| <b>Ramachandran favored (%)</b>                      | 95                                       |
| <b>Ramachandran outliers (%)</b>                     | 0.22                                     |
| <b>Rotamer outliers (%)</b>                          | 0.8                                      |
| <b>Clashscore</b>                                    | 4.13                                     |
| <b>Average B-factor</b>                              | 82.52                                    |
| <b>Macromolecules</b>                                | 82.52                                    |
| <b>Ligands</b>                                       | -                                        |
| <b>Solvent</b>                                       | -                                        |

Statistics for the highest-resolution shell are shown in parentheses. Atom count do not consider hydrogen atoms.

\* Friedel mates were averaged when calculating reflection statistics.

## 2. SUPPLEMENTAL FIGURES

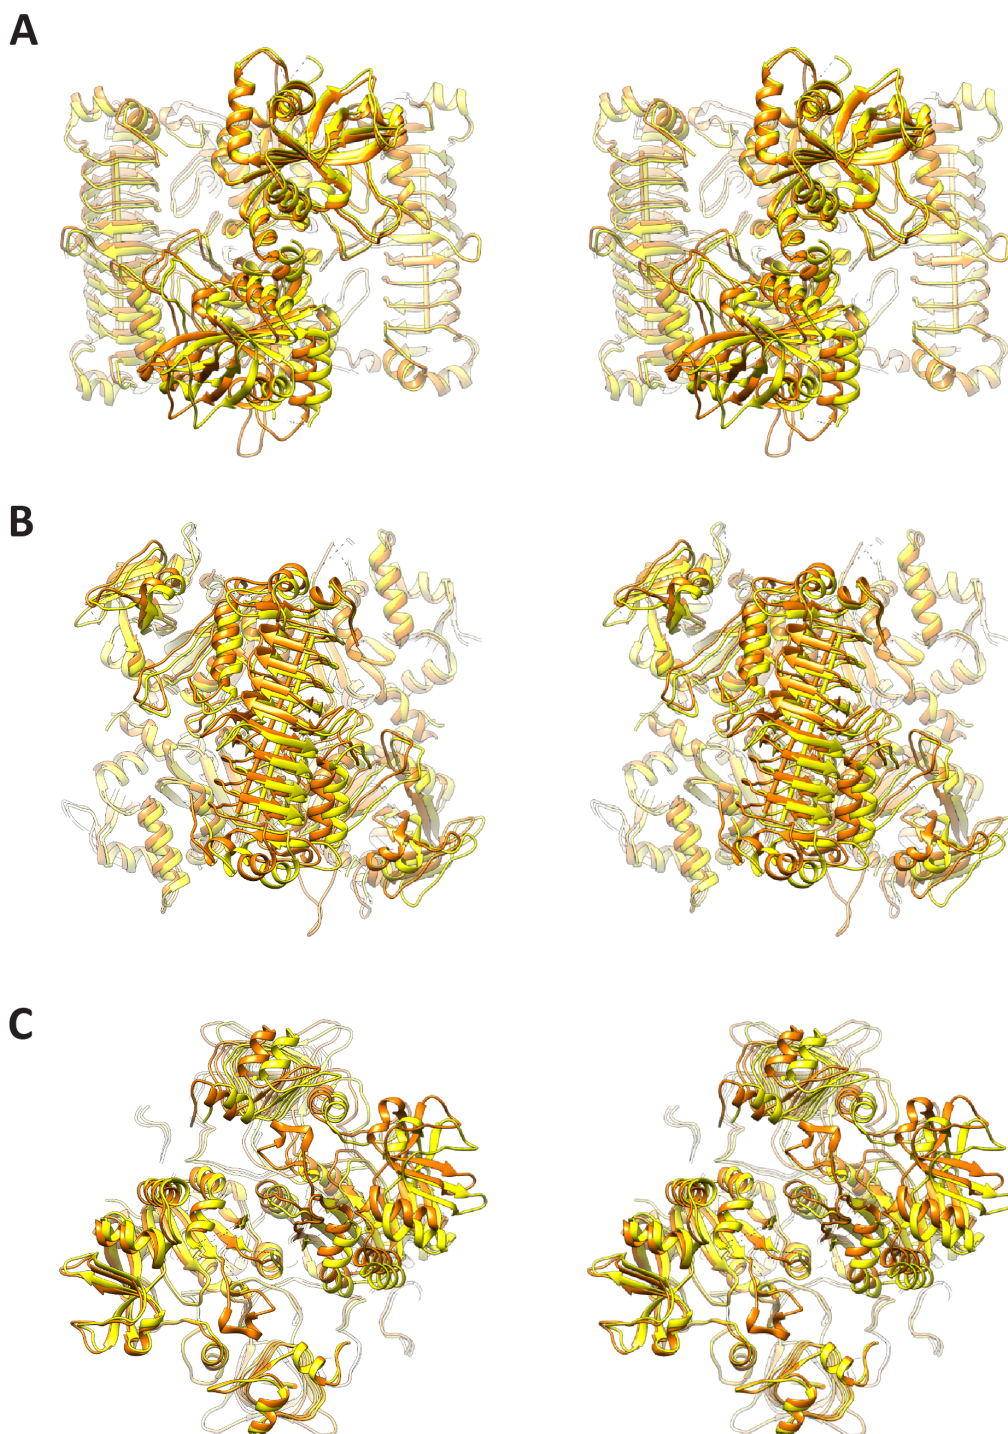

**Figure S1. The crystal structure of *EcAGPase•R130A*.** *A-B*. Two stereo views of the structural superposition between the *EcAGPase•R130A* (yellow) and *EcAGPase•FBP* (orange) tetramers, based on the alignment of  $L\beta H$  domains pairs as shown in Figure 8. *C*. Stereo view of the *EcAGPase•R130A* structure (protomer D: yellow) centred at the sensory motif, superimposed with an *EcAGPase•AMP•SUC* protomer (orange), revealing the prominent conformational changes leading the SM motif to partially occupy the AMP binding site. The other *EcAGPase•R130A* protomers of the asymmetric unit appear superposed in grey scale, showing variability in the RL1, RL2 regions and the G-rich loop.

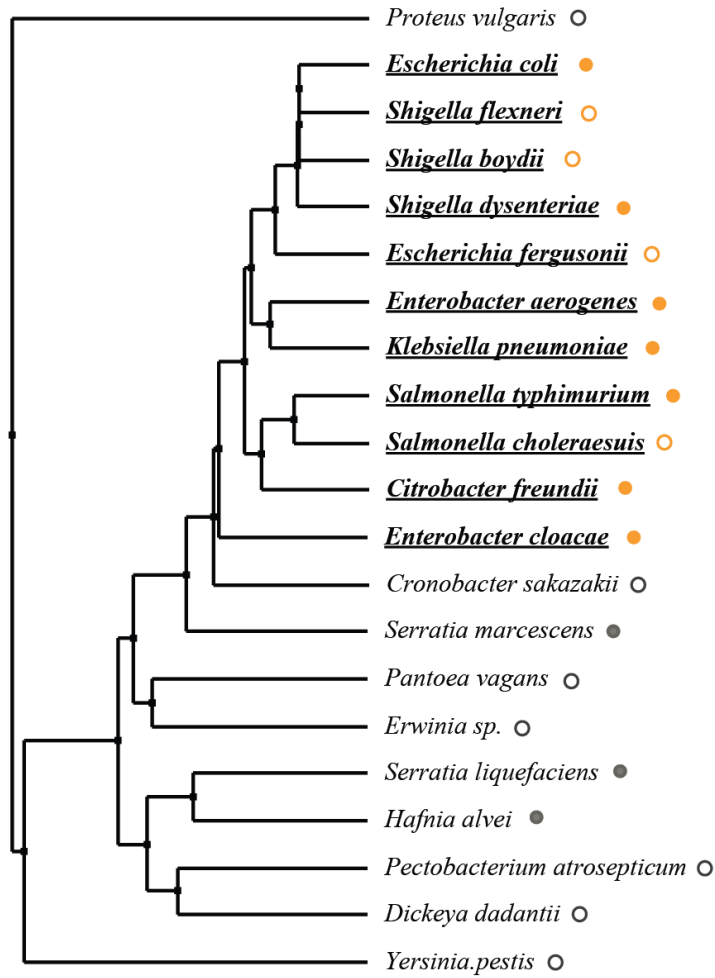

**Figure S2. Evolution of the FBP regulatory site within the enterobacteriaceae family of AGPases.** Middle distance BLOSUM62 tree. The species known to use FBP are marked with an orange spot and those proposed to use it, based on the conservation of the C-terminus, with an empty orange spot. The species reported not to be regulated by this metabolite are marked with a grey spot and those proposed not to be with an empty grey spot.
